# Supplementary material for: The influence of nicotine form on its absorption
Source: Research Square preprint supplement (doi:10.21203/rs.3.rs-7628503/v1), 2025-12-25
Supplement: Supplementary file 1 [file d9756b77a2454d3abc02469b.docx]

Supporting Information

**The influence of nicotine form on its absorption**

Zhuo Wang1, Huapeng Cui2, Suxing Tuo1, Wen Du1, Zhiguo Wang*1

1. Technology Center, China Tobacco Hunan Industrial Co., Ltd., Changsha 410072, China

2. Zhengzhou Tobacco Research Institute of CNTC, Zhengzhou450001, China

*Correspondence to Zhiguo Wang (15656095490@163.com)

**Table of Contents**

**1. Raw data and processing methods of the nicotine experiment based on ethanol absorption solution.**

**2. Raw data and processing methods of the nicotine experiment based on H2O absorption solution.**

**1. Raw data and processing methods of the nicotine experiment based on ethanol absorption solution.**

**Table S1. Raw data of the nicotine experiment based on ethanol absorption solution.**

| **Absorption Solution** | **Test E-liquid** | **The Peak Area of the Internal Standard (µV·s)** | | **The Peak Area of Nicotine in the Filter Pad (µV·s)** | **The Peak Area of Nicotine in the Absorption Solution (µV·s)** |
| --- | --- | --- | --- | --- | --- |
| **Ethanol** | **Nicotine 1** | 7.63E+7 | 1.71E+8 | | 6.77 E+7 |
| **Nicotine 2** | 7.38 E+7 | 1.82 E+8 | | 7.62 E+7 |
| **Nicotine Salt 1** | 7.53 E+7 | 1.68 E+8 | | 3.99 E+7 |
| **Nicotine Salt 2** | 7.38 E+7 | 1.50 E+8 | | 4.16 E+7 |
| **1 mmol/L HCl in ethanol solution** | **Nicotine 1** | 7.57 E+7 | 1.88 E+8 | | 7.58 E+7 |
| **Nicotine 2** | 7.38 E+7 | 1.81 E+8 | | 6.83 E+7 |
| **Nicotine Salt 1** | 7.93 E+7 | 1.52 E+8 | | 3.58 E+7 |
| **Nicotine Salt 2** | 7.79 E+7 | 1.51 E+8 | | 4.43 E+7 |
| **1 mmol/L NaOH in ethanol solution​** | **Nicotine 1** | 7.70 E+7 | 1.90 E+8 | | 8.62 E+7 |
| **Nicotine 2** | 7.46 E+7 | 1.93 E+8 | | 9.01 E+7 |
| **Nicotine Salt 1** | 7.82 E+7 | 1.56 E+8 | | 4.22 E+7 |
| **Nicotine Salt 2** | 7.30 E+7 | 1.46 E+8 | | 4.81 E+7 |

Since our study focuses on comparing the absorption intensities of nicotine solutions in different forms, the absolute intensity holds no significance. Here, we directly use the peak areas obtained from the experiments for data processing. The data processing workflow is as follows:

1: Each group of experiments is standardized based on the results of the standard substance to eliminate interference caused by instrument fluctuations during measurement.

2: The relative intensities of nicotine in the Cambridge filter extract and the nicotine absorption solution were calculated based on the amount of sample used in the GC-MS analysis, thereby obtaining the relative intensities of nicotine captured by the filter and absorbed by the solution in each experiment.

3: Based on the relative intensities of nicotine captured by the filter and absorbed by the solution in each experiment, the absorption strength of nicotine in different forms in solutions was calculated.

During data analysis, for the convenience of calculation, we divided all peak area data by 10⁸ before proceeding with further calculations.

**2. Raw data and processing methods of the nicotine experiment based on H2O absorption solution.**

**Table S2. Raw data of the nicotine experiment based on H2O absorption solution.**

| **Absorption Solution** | **Test E-liquid** | **the Weight of the Aerosol Generator Before the Experiment(g)** | **the Weight of the Aerosol Generator After the Experiment(g)** | | **The Peak Area of the Internal Standard (µV·s)** | **The Peak Area of Nicotine in the Filter Pad (µV·s)** |
| --- | --- | --- | --- | --- | --- | --- |
| **H2O** | **Nicotine 1** | 8.173 | 8.045 | 8.49E+07 | | 1.74E+08 |
| **Nicotine 2** | 7.454 | 7.309 | 8.34E+07 | | 2.04E+08 |
| **Nicotine Salt 1** | 8.096 | 8.004 | 8.28E+07 | | 1.97E+08 |
| **Nicotine Salt 2** | 7.637 | 7.549 | 8.11E+07 | | 1.88E+08 |
| **1 mmol/L HCl in H2O** | **Nicotine 1** | 8.045 | 7.899 | 8.86E+07 | | 2.01E+08 |
| **Nicotine 2** | 7.902 | 7.748 | 8.92E+07 | | 2.14E+08 |
| **Nicotine Salt 1** | 8.004 | 7.914 | 8.80E+07 | | 1.99E+08 |
| **Nicotine Salt 2** | 7.915 | 7.822 | 8.97E+07 | | 2.00E+08 |
| **1 mmol/L NaOH in H2O** | **Nicotine 1** | 7.749 | 7.603 | 8.45E+07 | | 2.00E+08 |
| **Nicotine 2** | 7.603 | 7.454 | 8.61E+07 | | 2.15E+08 |
| **Nicotine Salt 1** | 7.823 | 7.730 | 8.58E+07 | | 2.04E+08 |
| **Nicotine Salt 2** | 7.730 | 7.637 | 8.44E+07 | | 2.01E+08 |

Since our study focuses on comparing the absorption intensities of nicotine solutions in different forms, the absolute intensity holds no significance. Here, we directly use the peak areas obtained from the experiments for data processing. The data processing workflow is as follows:

1: Each group of experiments is standardized based on the results of the standard substance to eliminate interference caused by instrument fluctuations during measurement.

2: The liquid nicotine consumption in each experiment was obtained from the weight difference of the aerosol generator before and after the experiment.

3: The relative intensities of nicotine in the Cambridge filter extract was calculated based on the amount of sample used in the GC-MS analysis, thereby obtaining the relative intensities of nicotine captured by the filter in each experiment.

3: Based on the relative intensity of nicotine captured by the filter and the liquid nicotine consumption in each experiment, the relative intensity of nicotine captured by the filter per unit weight of nicotine was obtained.

4: Compare the solution absorption intensities of nicotine in different forms.

During data analysis, for the convenience of calculation, we divided all peak area data by 10⁸ before proceeding with further calculations.
